# Supplementary material
Source: PubMed Central journal article supplement (PMC3187519)

Supl. Figure 2

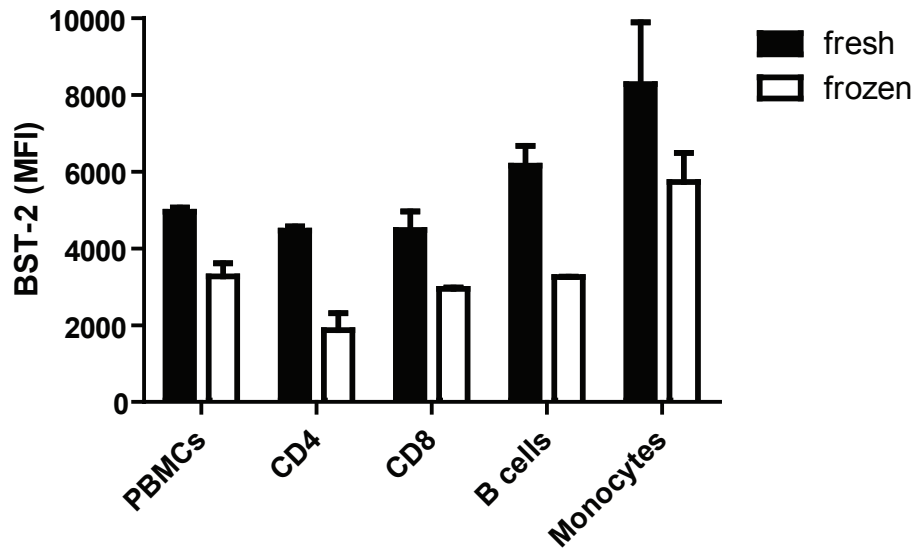

Supplemental Figure 2: Comparison of BST-2 signal intensity on frozen vs. fresh PBMCs.

Supplement: supp_85_20_10659__2.pdf [file supp_85_20_10659__2.pdf]
